# Supplementary material for: Synthesis and magnetic properties of a new polymorph of Cu2(VO4)(OH) with a quasi-2D layer structure
Source: Royal Society of Chemistry journal article supplement (doi:10.1039/c3dt53009d), 2013-12-06
Supplement: c3dt53009d.pdf [file c3dt53009d.pdf]

## Synthesis and Magnetic Properties of a New Polymorph of $\text{Cu}_2(\text{VO}_4)(\text{OH})$ with a Quasi-2D layer Structure

Su-Yun Zhang, Zhang-Zhen He\*, Ming Yang, Wen-Bin Guo, Ying-Ying Tang

### Supporting Information

**Table S1.** Atomic coordinates ( $\times 10^4$ ) and equivalent isotropic displacement parameters ( $\text{\AA}^2 \times 10^3$ ) for  $\text{Cu}_2(\text{VO}_4)(\text{OH})$ .

**Table S2.** Important bond length ( $\text{\AA}$ ) and bond angles ( $^\circ$ ) for  $\text{Cu}_2(\text{VO}_4)(\text{OH})$ .

**Figure S1.** Energy-dispersive X-ray spectroscopy of  $\text{Cu}_2(\text{VO}_4)(\text{OH})$ .

**Figure S2.** Simulated and experimental XRD powder patterns for  $\text{Cu}_2(\text{VO}_4)(\text{OH})$ .

**Scheme S1.** The coordination environments of Cu(1)-Cu(4) atoms (a-d).

**Scheme S2.** The coordination environments of V(1) and V(2) atoms (a, b).

Table S1. Atomic coordinates ( $\times 10^4$ ) and equivalent isotropic displacement parameters ( $\text{\AA}^2 \times 10^3$ ) for  $\text{Cu}_2(\text{VO}_4)(\text{OH})$ .

|       | x         | y       | z       | U(eq) |
|-------|-----------|---------|---------|-------|
| Cu(1) | -2738(1)  | 3369(1) | 9264(1) | 16(1) |
| Cu(2) | -236(1)   | 6198(1) | 8600(1) | 7(1)  |
| Cu(3) | 2359(1)   | 8977(1) | 7852(1) | 7(1)  |
| Cu(4) | 4693(1)   | 6221(1) | 8640(1) | 7(1)  |
| V(1)  | -7723(1)  | 2778(1) | 8448(1) | 5(1)  |
| V(2)  | 7160(1)   | 9379(1) | 9199(1) | 5(1)  |
| O(1)  | -7813(6)  | 2081(3) | 9475(2) | 15(1) |
| O(2)  | -7532(5)  | 1222(2) | 7724(2) | 9(1)  |
| O(3)  | -10205(4) | 3914(4) | 8249(2) | 9(1)  |
| O(4)  | -5381(5)  | 3939(4) | 8319(2) | 8(1)  |

|       |          |          |          |       |
|-------|----------|----------|----------|-------|
| O(5)  | -2758(5) | 5638(3)  | 9375(2)  | 7(1)  |
| O(6)  | 2289(5)  | 6722(2)  | 7855(2)  | 5(1)  |
| O(7)  | 4710(5)  | 8533(4)  | 8788(2)  | 12(1) |
| O(8)  | 7260(5)  | 11284(3) | 8874(2)  | 12(1) |
| O(9)  | 9448(5)  | 8451(4)  | 8783(2)  | 13(1) |
| O(10) | 7170(5)  | 9234(3)  | 10306(2) | 12(1) |

U(eq) is defined as one third of the trace of the orthogonalized Uij tensor.

Table S2. Important bond length (Å) and bond angles (°) for Cu<sub>2</sub>(VO<sub>4</sub>) (OH).

|                     |            |                     |            |
|---------------------|------------|---------------------|------------|
| Cu(1)-O(8)#1        | 1.877(2)   | Cu(1)-O(1)#2        | 1.926(3)   |
| Cu(1)-O(5)          | 1.949(2)   | Cu(1)-O(4)          | 2.190(3)   |
| Cu(1)-O(3)#3        | 2.207(3)   | Cu(2)-O(6)          | 1.945(3)   |
| Cu(2)-O(9)#4        | 1.957(3)   | Cu(2)-O(5)          | 1.975(3)   |
| Cu(2)-O(3)#3        | 2.024(3)   | Cu(2)-O(10)#5       | 2.221(3)   |
| Cu(3)-O(6)          | 1.930(2)   | Cu(3)-O(2)#7        | 1.932(2)   |
| Cu(3)-O(7)          | 2.032(3)   | Cu(3)-O(3)#6        | 2.102(3)   |
| Cu(3)-O(9)#4        | 2.291(3)   | Cu(4)-O(6)          | 1.918(3)   |
| Cu(4)-O(5)#3        | 1.959(3)   | Cu(4)-O(7)          | 1.991(3)   |
| Cu(4)-O(4)#3        | 2.012(3)   | Cu(4)-O(10)#5       | 2.229(3)   |
| V(1)-O(1)           | 1.650(2)   | V(1)-O(2)           | 1.720(2)   |
| V(1)-O(4)           | 1.742(3)   | V(1)-O(3)           | 1.814(3)   |
| V(2)-O(10)          | 1.661(3)   | V(2)-O(8)           | 1.702(2)   |
| V(2)-O(9)           | 1.714(3)   | V(2)-O(7)           | 1.762(3)   |
| O(8)#1-Cu(1)-O(1)#2 | 96.56(11)  | O(8)#1-Cu(1)-O(5)   | 166.78(10) |
| O(1)#2-Cu(1)-O(5)   | 96.64(10)  | O(8)#1-Cu(1)-O(4)   | 90.62(12)  |
| O(1)#2-Cu(1)-O(4)   | 131.26(14) | O(5)-Cu(1)-O(4)     | 80.10(12)  |
| O(8)#1-Cu(1)-O(3)#3 | 89.32(12)  | O(1)#2-Cu(1)-O(3)#3 | 137.08(14) |
| O(5)-Cu(1)-O(3)#3   | 81.50(12)  | O(4)-Cu(1)-O(3)#3   | 90.94(10)  |
| O(6)-Cu(2)-O(9)#4   | 85.95(11)  | O(6)-Cu(2)-O(5)     | 178.73(11) |
| O(9)#4-Cu(2)-O(5)   | 94.69(11)  | O(6)-Cu(2)-O(3)#3   | 93.83(11)  |

|                      |            |                      |            |
|----------------------|------------|----------------------|------------|
| O(9)#4-Cu(2)-O(3)#3  | 171.40(13) | O(5)-Cu(2)-O(3)#3    | 85.70(11)  |
| O(6)-Cu(2)-O(10)#5   | 86.86(11)  | O(9)#4-Cu(2)-O(10)#5 | 97.18(12)  |
| O(5)-Cu(2)-O(10)#5   | 91.97(11)  | O(3)#3-Cu(2)-O(10)#5 | 91.39(11)  |
| O(6)-Cu(2)-O(2)#6    | 88.12(10)  | O(9)#4-Cu(2)-O(2)#6  | 92.99(11)  |
| O(5)-Cu(2)-O(2)#6    | 92.94(10)  | O(3)#3-Cu(2)-O(2)#6  | 78.41(10)  |
| O(10)#5-Cu(2)-O(2)#6 | 168.31(9)  | O(6)-Cu(3)-O(2)#7    | 174.44(10) |
| O(6)-Cu(3)-O(7)      | 80.01(12)  | O(2)#7-Cu(3)-O(7)    | 103.30(12) |
| O(6)-Cu(3)-O(3)#6    | 87.89(12)  | O(2)#7-Cu(3)-O(3)#6  | 88.23(12)  |
| O(7)-Cu(3)-O(3)#6    | 165.87(13) | O(6)-Cu(3)-O(9)#4    | 77.60(11)  |
| O(2)#7-Cu(3)-O(9)#4  | 106.37(11) | O(7)-Cu(3)-O(9)#4    | 94.74(11)  |
| O(3)#6-Cu(3)-O(9)#4  | 89.70(12)  | O(6)-Cu(4)-O(5)#3    | 176.21(10) |
| O(6)-Cu(4)-O(7)      | 81.34(10)  | O(5)#3-Cu(4)-O(7)    | 100.76(11) |
| O(6)-Cu(4)-O(4)#3    | 93.13(10)  | O(5)#3-Cu(4)-O(4)#3  | 84.49(10)  |
| O(7)-Cu(4)-O(4)#3    | 172.52(13) | O(6)-Cu(4)-O(10)#5   | 87.29(11)  |
| O(5)#3-Cu(4)-O(10)#5 | 95.61(11)  | O(7)-Cu(4)-O(10)#5   | 95.65(11)  |
| O(4)#3-Cu(4)-O(10)#5 | 89.09(11)  | O(1)-V(1)-O(4)       | 109.66(15) |
| O(1)-V(1)-O(2)       | 107.97(12) | O(1)-V(1)-O(3)       | 108.60(15) |
| O(2)-V(1)-O(4)       | 108.52(14) | O(4)-V(1)-O(3)       | 110.47(11) |
| O(2)-V(1)-O(3)       | 111.58(14) | O(10)-V(2)-O(9)      | 108.93(15) |
| O(10)-V(2)-O(8)      | 110.89(12) | O(10)-V(2)-O(7)      | 108.73(15) |
| O(8)-V(2)-O(9)       | 108.16(15) | O(9)-V(2)-O(7)       | 111.25(13) |
| O(8)-V(2)-O(7)       | 108.90(15) |                      |            |

---

Symmetry transformations used to generate equivalent atoms:

#1  $x-1, y-1, z$ ; #2  $x+1/2, -y+1/2, -z+2$ ; #3  $x+1, y, z$ ; #4  $x-1, y, z$ ; #5  $x-1/2, -y+3/2, -z+2$ ; #6  $-x-1, y+1/2, -z+3/2$ ; #7  $x+1, y+1, z$ .

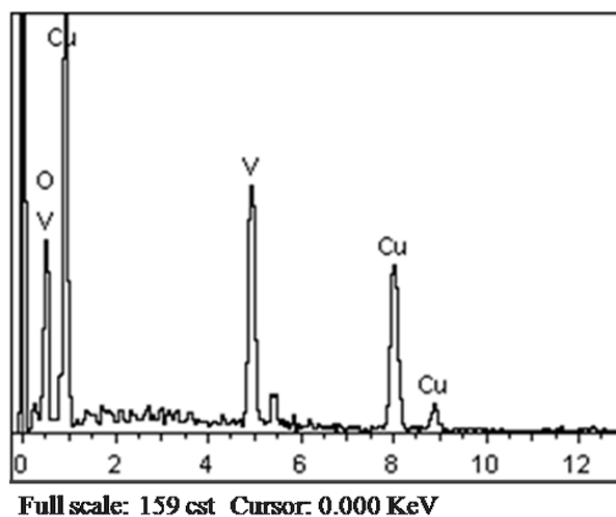

Figure S1. Energy-dispersive X-ray spectroscopy of  $\text{Cu}_2(\text{VO}_4)(\text{OH})$ .

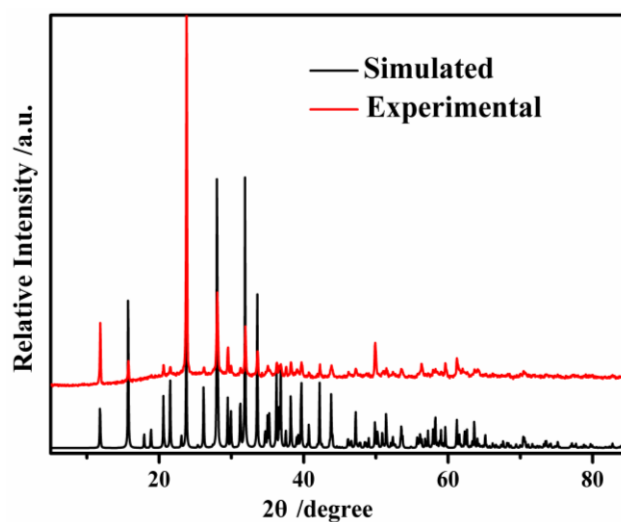

Figure S2. Simulated and experimental XRD powder patterns for  $\text{Cu}_2(\text{VO}_4)(\text{OH})$ .

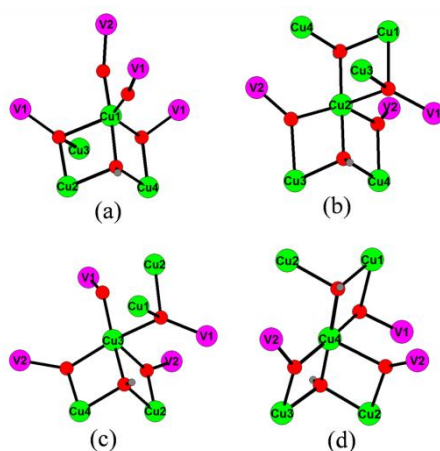

Scheme S1. The coordinaton enviroments of Cu(1)-Cu(4) atoms (a-d).

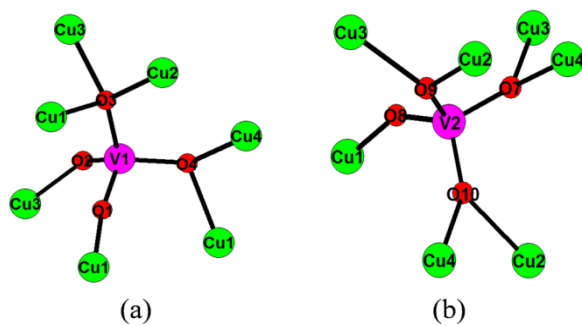

Scheme S2. The coordinaton enviroments of V(1) and V(2) atoms (a, b).
